# Supplementary material
Source: PubMed Central journal article supplement (PMC7111182)
Supplement: mmc1.pdf [file mmc1.pdf]

**Immunity, Volume 38**

## **Supplemental Information**

### **Maturation of Lymph Node Fibroblastic**

### **Reticular Cells from Myofibroblastic Precursors**

### **Is Critical for Antiviral Immunity**

**Qian Chai, Lucas Onder, Elke Scandella, Cristina Gil-Cruz, Christian Perez-Shibayama, Jovana Cupovic, Renzo Danuser, Tim Sparwasser, Sanjiv A. Luther, Volker Thiel, Thomas Rüllicke, Jens V. Stein, Thomas Hehlhans, and Burkhard Ludewig**

### **Supplemental Inventory**

Figure S1, Related to Figure 1

Figure S2, Related to Figure 2

Figure S3, Related to Figure 5

Figure S4, Related to Figure 6

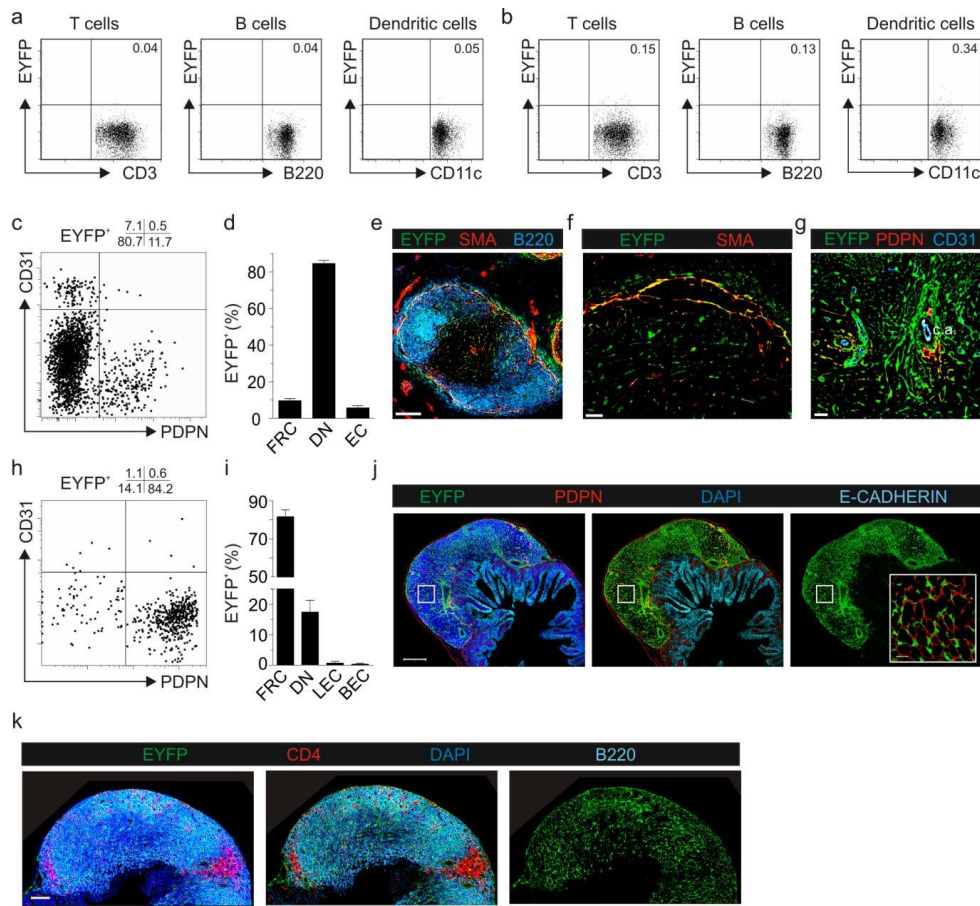

**Figure S1. Transgene Expression in Secondary Lymphoid Organs of *Ccl19-cre* Mice, Related to Figure 1**

(a-b) Lack of *Ccl19-cre* transgene activity in non-stromal LN cells. LN cell suspensions from 6 wk old *Ccl19-crexR26-eyfp* (a) or *Ccl19-cre* control mice (b) were stained with antibodies against CD45, CD3, B220, and CD11c. EYFP expression in the different CD45<sup>+</sup> cell populations was determined by flow cytometry. Values in the upper right quadrant of one representative dot plot analyses out of six indicate EYFP-positive cells in the respective cell population.

(c-g) *Ccl19-cre* expression in splenic stromal cells. (c) Spleen cell suspensions from 6 wk old *Ccl19-crexR26-eyfp* mice were depleted of CD45<sup>+</sup> cells, and EYFP expression was determined by flow cytometry. Representative dot plot analysis with percentage of EYFP expression in CD45<sup>-</sup> splenic stromal cells. (d) EYFP expression in CD45<sup>-</sup> splenic stromal cell populations (PDPN<sup>+</sup>CD31<sup>-</sup> fibroblastic reticular cells (FRC); PDPN<sup>-</sup>CD31<sup>-</sup> double negative cells (DN); CD31<sup>+</sup> endothelial cells (ECs)); mean percentage $\pm$ SEM (n=6 mice). (e) Confocal microscopic analysis of splenic white pulp *Ccl19-crexR26-eyfp* section using antibodies against the indicated markers, scale bar = 100  $\mu$ m. High resolution analysis of EYFP expression in splenic marginal zone (f) and central arteriole area (c.a.) (g).

(h-k) *Ccl19-cre* expression in Peyer's patch (PP) stromal cells. (h) PP single cell suspensions from 6 wk old *Ccl19-crexR26-eyfp* mice were depleted of CD45<sup>+</sup> cells, and EYFP expression was determined by flow cytometry. Representative dot plot analysis with percentage of EYFP expression in CD45<sup>-</sup> PP stromal cells.

(i) EYFP expression in CD45<sup>-</sup> PP stromal cell populations (PDPN<sup>+</sup>CD31<sup>-</sup> fibroblastic reticular cells (FRC); PDPN<sup>-</sup>CD31<sup>-</sup> double negative cells (DN); PDPN<sup>-</sup>CD31<sup>+</sup> blood endothelial cells (BEC); PDPN<sup>+</sup>CD31<sup>+</sup> lymphatic endothelial cells (LEC)); mean percentage $\pm$ SEM (n=4 mice).

(j, k) Confocal microscopic analysis of PP in *Ccl19-crexR26-eyfp* mice using antibodies against the indicated markers, scale bar in (j) = 200  $\mu$ m, scale bar in (k) = 50  $\mu$ m.

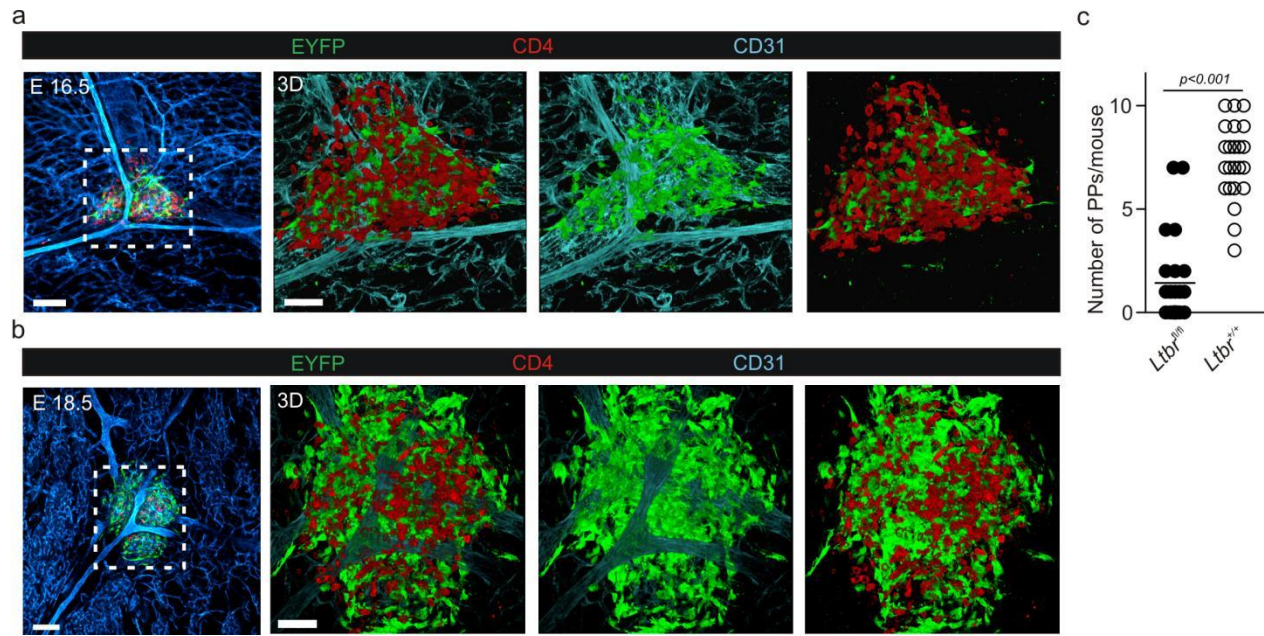

**Figure S2. LN and PP Development in *Ccl19-cre* Mice, Related to Figure 2**

(a-b) Characterization of *Ccl19-cre*<sup>+</sup> mesenchymal stromal cells in developing LNs at embryonic days (E) 16.5 (a) and E18.5 (b). *Ccl19-crexR26-eyfp* embryos were analyzed for transgene expressing cells (EYFP<sup>+</sup>, green) in inguinal LN anlagen by confocal microscopy. The characteristic branching pattern of the blood vessels (CD31<sup>+</sup>, blue) and accumulation of LT<sub>i</sub> cells (CD4<sup>+</sup>, red) facilitated localization of the anlage (left panels in (a) and (b)); scale bars = 40  $\mu$ m. Right panels show 3D reconstructions of the boxed area in left panel, scale bars = 100  $\mu$ m. Representative data from one out of three samples per time point.

(c) Presence of PPs in 6 wk old *Ccl19-crexLtbr<sup>fl/fl</sup>* and *Ltbr<sup>+/+</sup>* mice was assessed following Evan's Blue application. Values indicate number of detectable PPs per mouse in the indicated strain.

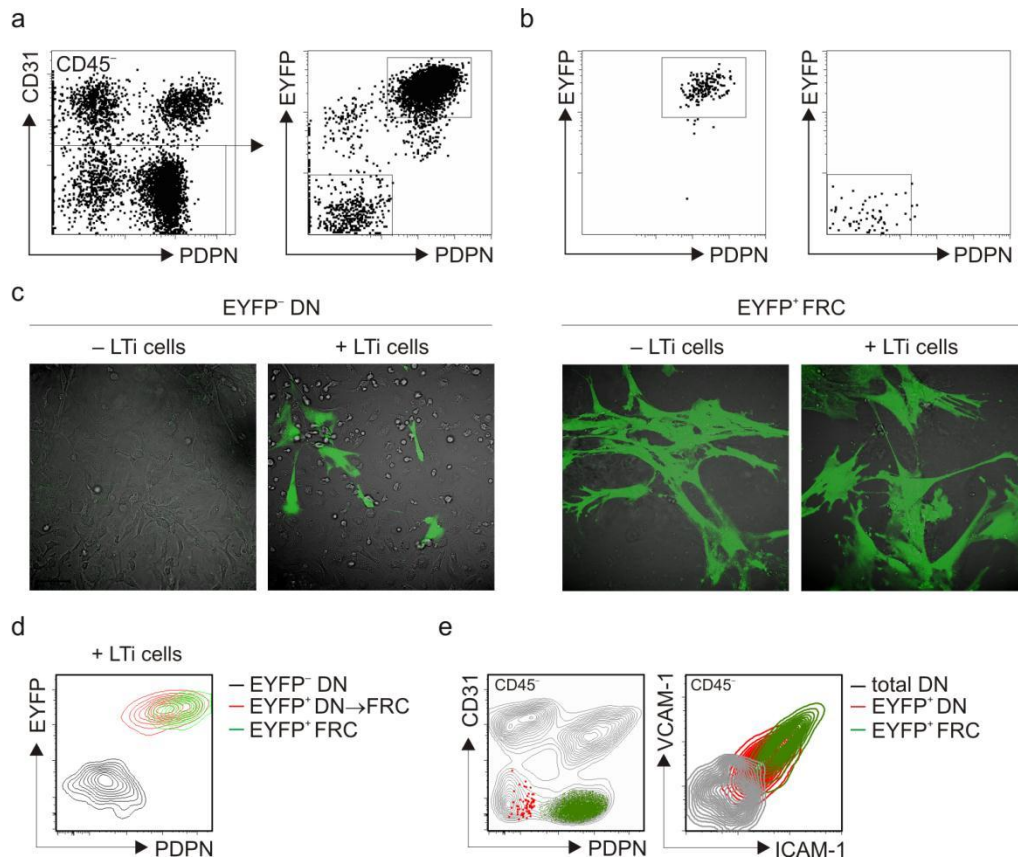

**Figure S3. Maturation of *Ccl19-cre*-Expressing Stromal Cells, Related to Figure 5**

(a) CD31<sup>+</sup> LN stromal cells from *Ccl19-crexR26-eyfp* mice were sorted by flow cytometry into PDPN<sup>−</sup>EYFP<sup>−</sup> double-negative (DN) and PDPN<sup>+</sup>EYFP<sup>+</sup> FRCs (n=6 mice).

(b) Post-sorting confirmation of cell purity. (c) EYFP<sup>−</sup> DN cells and EYFP<sup>+</sup> FRCs were cultured in vitro on basement membrane protein-coated plates in the absence or presence of B220<sup>+</sup>CD3<sup>+</sup>CD11c<sup>+</sup>CD3<sup>+</sup>CD4<sup>+</sup> LTi cells obtained from spleens of recombination-activating gene (RAG)-deficient mice. Seven days later, EYFP expression was determined by confocal laser scanning microscopy. Microphotographs show representative areas of stromal cell cultures in an overlay of phase-contrast light microscopy and immunofluorescence.

(d) Flow cytometric analysis of PDPN expression on the indicated stromal cell populations following in vitro co-cultivation with LTi cells.

(e) Flow cytometric analysis showing representative contour plot of CD31- and PDPN-expressing, pooled CD45<sup>−</sup> LTβR-competent LN stromal cells (left panel) with back-gating of ICAM1<sup>−</sup> and VCAM1<sup>−</sup> expressing cell populations as indicated in the right panel. Representative data from one out of two independent experiments.

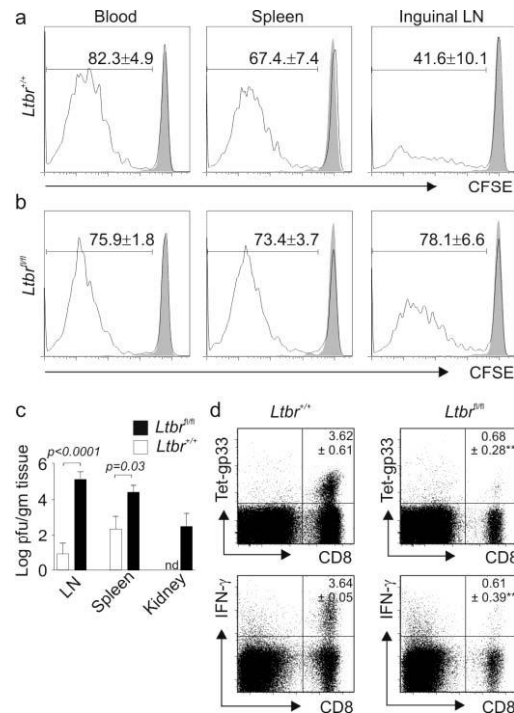

**Figure S4. Immune Reactivity in the Absence of LTβR-Mediated FRC Maturation, Related to Figure 6**

(a-b) Dendritic cell (DC)-T cell interaction in the absence of LTβR-mediated FRC maturation. Two million CFSE-labeled CD8<sup>+</sup> T cells expressing a T cell receptor specific for the MHV spike protein-derived, H2-Kb-binding S598 epitope (TCR-S) were adoptively transferred into *Ltbr*<sup>+/+</sup> (a) or *Ccl19-crexLtbr*<sup>fl/fl</sup> mice (b) using intravenous injection. One day later, recipients were immunized subcutaneously into the right flank with 2.5×10<sup>5</sup> bone marrow-derived DCs pulsed with S598 peptide. T cell activation was determined on day 3.5 post DC immunization in blood, spleen and skin-draining inguinal LN by flow cytometry (black lines). Control mice received CFSE-labeled TCR-S cells i.v. and 2.5×10<sup>5</sup> bone marrow-derived DCs s.c. with peptide (grey-shaded histograms). Values in histograms indicate mean percentage±SEM of proliferated cells pooled from 2 independent experiments (n= 4 mice).

(c-d) Assessment of immune reactivity against LCMV infection in the absence of FRC-specific LTβR signaling. *Ccl19-crexLtbr*<sup>fl/fl</sup> and *Ltbr*<sup>+/+</sup> mice were infected intravenously with 200 pfu of LCMV WE. (c) Viral titers in the indicated organs were determined at day 8 post infection (mean viral titers±SEM, n=7 mice); nd, not detectable. (d) Antiviral CD8<sup>+</sup> T cell responses in LNs were determined by H2-Db-gp33 tetramer analysis (upper panels) and intracellular staining for gp33-responsive IFN-γ-producing CD8<sup>+</sup> T cells (lower panels). Values in the upper right quadrant indicate mean percentages±SEM of specific cells in the lymphocyte gate, n=6 mice (\*\*, p<0.01).
